# Flu-CNN: predicting host tropism of influenza A viruses via character-level convolutional networks

Nan Luo<sup>1,2†</sup>, Xin Wang<sup>1†</sup>, Boqian Wang<sup>1</sup>, Renjie Meng<sup>1,2</sup>, Yunxiang Zhao<sup>1</sup>, Zili Chai<sup>1</sup>, Yuan Jin<sup>1</sup>, Junjie Yue<sup>1</sup>, Mingda Hu<sup>1\*</sup>, Wei Chen<sup>2\*</sup>, Hongguang Ren<sup>1\*</sup>

<sup>1</sup> Beijing Institute of Biotechnology, State Key Laboratory of Pathogen and Biosecurity, Beijing, China.

<sup>2</sup> College of Computer, National University of Defense Technology, Changsha, China.

\*Correspondence to: Hongguang Ren, [bioren@163.com](mailto:bioren@163.com); or Chen Wei, [chenwei@nudt.edu.cn](mailto:chenwei@nudt.edu.cn); or Mingda Hu, [phdhumingda@163.com](mailto:phdhumingda@163.com).

† These authors contributed equally to this paper.

**Abstract:** Throughout history, Influenza A viruses (IAVs) have caused significant harm and catastrophic pandemics. The presence of host barriers results in viral host tropism, where infected hosts are subject to strict restrictions due to the hindered spread of viruses across hosts. Therefore, the identification of host tropism of IAVs, particularly in humans, is crucial to preventing the cross-host transmission of avian viruses and their outbreaks in humans. Nevertheless, efficiently and effectively identifying host tropism, especially for early host susceptibility warnings based on viral genome sequences during outbreak onset, remains challenging. To address this challenge, we propose Flu-CNN, a deep neural network model based on classical character-level convolutional networks. By analyzing the genomic segments of IAVs, Flu-CNN can accurately identify the host tropism, with a particular focus on avian influenza viruses that may infect humans. According to our experimental evaluations, Flu-CNN achieved an accuracy of 99% in identifying virus hosts via only a single genomic segment, even for subtypes with a relatively small number of viral strains such as H5N1, H7N9, and H9N2. The superiority of Flu-CNN demonstrates its effectiveness in screening for critical amino acid mutations, which is important to host adaptation, and zoonotic risk prediction of viral strains. Flu-CNN is a valuable tool for identifying evolutionary characterization, monitoring potential outbreaks, and preventing epidemical spreads of IAVs, which contribute to the effective surveillance of influenza A viruses.

**Keywords:** Influenza A virus; Host tropism; Deep learning; Amino acid substitutions; Zoonotic strains.

## 1 Introduction

Influenza A virus (IAV) is capable of infecting a wide range of hosts, including humans, birds, and other mammals [1]. Throughout history, IAV has become a frequent and leading cause of respiratory infections in both human and avian species, which may result in significant morbidity and mortality [2]. For human beings, IAV has caused several pandemics throughout history, among which the 1918-19 H1N1 influenza pandemic stands out, as it resulted in the deaths of nearly 50 million people and inflicted significant damage upon human health and well-being [3]. In terms of birds, the H5N1 avian influenza viruses have swept through Asia, Africa, Europe and North America since 2021, leading to the death of millions of poultry and wild birds [4]. To date, IAVs have caused several pandemics and have become a major and persistent threat to human and avian health.

One phenomenon is that IAVs can only infect specific hosts, which indicates that the IAV is restricted by its host tropism, i.e., host specificity [5]. This implies that IAVs have the adaptability of hosts [6]. The host tropism of IAVs is due to the presence of host barriers, which typically impedes the easy spread of these viruses across hosts. Consequently, avian influenza viruses are prevented from causing disease in humans by host barriers. However, IAVs may break host barriers through evolution, by acquiring mutations and reassortments that alter their receptor binding affinity and antigenicity [7, 8]. Some avian influenza viruses, such as H5N1,

50 H7N9, and H9N2, have been reported to infect humans occasionally [9-11]. From January 2003  
51 to April 2023, 868 cases of human infection with H5N1 avian influenza have been reported  
52 from 21 countries, including 457 deaths [12]. Therefore, these subtypes can be greatly  
53 dangerous to human beings. Meanwhile, phylogenetic studies have shown that the genes in  
54 waterfowl are often considered to be the origin of IAVs from other species [13]. This suggests  
55 that the changes in host tropism may be the main cause of cross-species transmission. Although  
56 the host barrier can protect humans from avian influenza viruses to some extent, avian influenza  
57 viruses can still pose a great threat to human health once they change their host tropism.  
58 Therefore, predicting host tropism of IAVs is of great importance in the surveillance of  
59 pandemics, especially for monitoring the cross-species transmission of IAVs.  
60 Previous experimental studies have identified numerous factors that influence the host tropism  
61 of IAVs, including receptor binding affinity, viral genome replication, and host immunity  
62 antagonization [14-16]. However, it is still difficult to determine the host tropism of large  
63 numbers of IAVs efficiently and effectively, using experimental methods. Besides, performing  
64 such biological experiments also requires high standards of biological laboratories, which  
65 limits the scalability of such investigations. Therefore, many computational tools have been  
66 developed to analyze viral sequences for their host tropism, including distinct host tropism  
67 protein signatures, zoonotic risk of IAVs, avian influenza transmission from avian to human,  
68 and prediction of human-adapted IAVs based on viral nucleotide composition [17-19]. Most of  
69 these methods can be effective, but they require feature extraction from the input sequence and  
70 even particular analysis of host genomic information, which may limit their application.  
71 Furthermore, current methods may not fully leverage the vast amount of genomic data available  
72 for IAVs, resulting in the potential loss of critical information during the analysis process.  
73 Therefore, the performance and application of those methods may be greatly limited.  
74 In this study, we propose a novel approach using Character-level Convolutional Neural  
75 Networks (Char-CNN) [20]. Inspired by classical Char-CNN models, our method analyzes the  
76 whole genome or some segments of IAVs to predict the viral host tropism. We had collected a  
77 large-scale dataset from three major databases, including NCBI Virus  
78 (<https://www.ncbi.nlm.nih.gov/labs/virus>) [21], GISAID (<https://www.gisaid.org>) [22], and  
79 BV-BRC (<https://www.bv-brc.org>) [23], which comprises both human and avian categories for  
80 model training and evaluation. To our knowledge, this is the first work which has used such a  
81 large-scale dataset for IAVs host tropism prediction. The evaluation result demonstrates that our  
82 approach can effectively identify the host tropism of IAVs with an accuracy rate of 99%, using  
83 just a single genomic segment of IAV. Moreover, our method can likewise achieve a stable and  
84 high accuracy across various subtypes, particularly on avian influenza subtypes with a small  
85 number of viral strains such as H5N1, H7N9, and H9N2. Furthermore, we have also explored  
86 our method in other perspectives. We have investigated the interpretability of Flu-CNN, and  
87 our method can learn the key features to distinguish the hosts by convolution. We also use  
88 Flu-CNN to explore the important amino acid substitutions which can change the IAV  
89 adaptation. Based on Flu-CNN, we have screened on PB2, PA (polymerase acidic protein) and  
90 NP (nucleoprotein) proteins to obtain some key amino acid substitutions. Moreover, we use  
91 Flu-CNN to identify the zoonotic risk of IAVs strains for estimating the potential high-risk  
92 strains circulating in avian. Our result demonstrates that H5N1, H7N9, and H9N2 subtypes  
93 have the highest zoonotic risk. This research produces a valuable tool for identifying the host  
94 tropism of IAV as well as innovative insights into the evolutionary characterization of IAV,  
95 which may contribute to the surveillance of potential outbreaks and spread of IAVs.

## 96 **2 Materials and Methods**

### 97 **2.1 Workflow and Data Processing**

98 To predict IAVs host tropism, we employed a 4-step workflow, as depicted in Figure 1. Firstly,  
99 we collected the genome data of IAVs and only retained high-quality sequences. Subsequently,

100 we separated the genome data into training, validation, and test sets. Moreover, genome data  
 101 were also encoded into amino acid sequences so that they can be processed by computers. Then,  
 102 we used the constructed neural network of Flu-CNN for model training. Finally, we employed  
 103 Flu-CNN to perform evaluations and further downstream analysis. This workflow enabled us to  
 104 predict IAVs host tropism rapidly and accurately.  
 105 To obtain high-quality IAV genomic sequences, we retrieved RNA FASTA sequences of IAVs  
 106 whole genome coding region from three major databases, including NCBI Virus, IRD and  
 107 GISAID, as of October 14, 2022. As these databases contain numerous duplicate entries, we  
 108 discarded strains with ambiguous characters, mislabeled epidemiological information, and  
 109 incomplete metadata, and only retained one strain with consistent strain name and sequence.  
 110 The reference strain (accession number A/New York/392/2004) on the NCBI Virus was used as  
 111 the baseline, and only sequences within 10% difference in length were retained, and other  
 112 sequences considered outliers (too long or too short) were discarded. Meanwhile, only  
 113 sequences with hosts of human and avians are retains, with sequences of other hosts discarded.  
 114 Consequently, a total of 911,098 sequences of 156,671 strains were obtained, including 630,656  
 115 sequences of 78,832 strains with the whole genome of eight segments. The sample distribution  
 116 of these strains by host, subtype, year, and geographic region is presented in the supplementary  
 117 material. We divided the genome data into training, validation, and test sets by a ratio of 6:2:2.  
 118

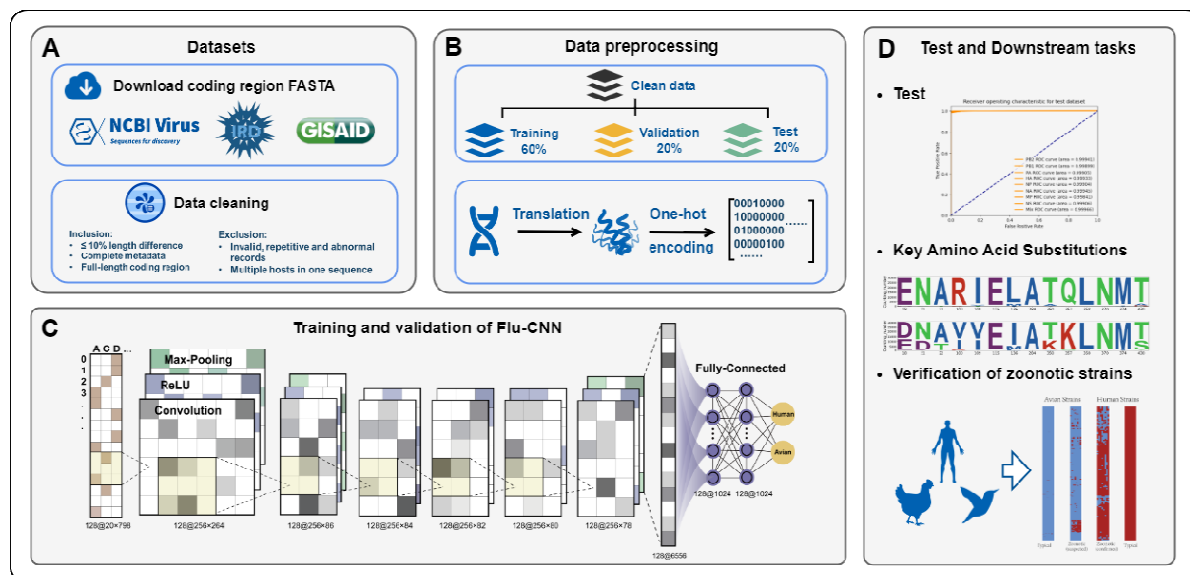

119  
 120  
 121 Fig. 1 The workflow of IAVs host tropism prediction. The workflow is designed from left to right as follows: A. Data  
 122 downloading and cleaning to generate datasets. B. Data preprocessing to partition datasets, translation and coding. C.  
 123 Flu-CNN construction and training. D. Tropism prediction and downstream tasks, including predicting IAVs host tropism,  
 124 screening key amino acid substitutions, and predicting zoonotic strains.  
 125

126 To enable the neural network model to recognize protein sequences, we use a unique one-hot  
 127 encoding method that transforms each protein sequence into a matrix of values  $V_{ij}$ , where  
 128 represents the type of amino acid and  $i$  represents the length of the protein sequence. Each  
 129 amino acid is represented by a particular row in the matrix. For instance, a sequence of  
 130 amino acids in length would become a rectangular matrix of  $n \times l$  after unique thermal  
 131 encoding; for the  $i$ -th column, the first position is  $V_{1i}$  if the  $i$ -th residue in the sequence is  
 132 Alanine, and the rest positions are all 0.

### 133 2.2 Flu-CNN Structure and Model Training

134 Besides the size of the training data, the parameter size is also important to models, which  
 135 determines whether the model can fit complex real-world scenarios. Convolutional Neural

136 Network (CNN) is a type of deep learning model which is commonly used in computer vision  
137 and natural language processing, such as image recognition and object detection [38]. CNN  
138 models can extract local features from inputs like images or texts. Among them, the Char-CNN  
139 model has a simple structure with high accuracy and efficiency, making it suitable for text  
140 classification tasks. The basic structure of Char-CNN consists of two kinds of layers: a  
141 convolutional layer and a fully connected layer. The output of the pooling layer summarizes the  
142 input data to some extent. The fully connected layer uses the features extracted by convolution  
143 and pooling to output classification results, which uses the Softmax function as the activation  
144 function to normalize the predicted probability of each category.

145 Inspired by Char-CNN, we construct a deep network called Flu-CNN. It comprises six  
146 convolutional layers and three fully connected layers, with ReLU and Pooling in the  
147 convolutional layers and ReLU and Dropout in the fully connected layers [39, 40]. The final  
148 output is a two-dimensional vector, indicating the possibility of viral human/avians tropism.  
149 ReLU introduces nonlinearity, which addresses the gradient disappearance problem and  
150 reduces the dependency between neurons. Dropout is a regularization method that randomly  
151 discards some of the neurons in the neural network. Dropout can prevent the network from  
152 becoming too dependent on specific local features and can learn more robust features, which  
153 improves the performance on new samples.

154 In this study, we set the training epoch to 200, with a batch size of 128. The cross-entropy is  
155 used as the loss function, as shown in the following equation:

$$Loss = -(y \log \hat{y} + (1 - y) \log(1 - \hat{y}))$$

156 where  $y$  represents the true label, which takes the value of 0 or 1, and  $\hat{y}$  is the predicted label,  
157 which indicates the probability that the sample belongs to the positive case and takes the value  
158 from 0 to 1. The above equation is equivalent to  $-\log \hat{y}$  when  $y = 1$  and  $-\log(1 - \hat{y})$ ,  
159 when  $y = 0$ . For a binary classification problem, the loss function converges to 0 if the model  
160 predicts correctly ( $\hat{y}$  is close to the true label value), and increases otherwise.

161 To evaluate the model, four metrics are taken into account, including accuracy, precision, recall,  
162 and F1-score, which are calculated as follows:

$$Accuracy = \frac{TP + TN}{TP + FP + TN + FN}$$

$$Precision = \frac{TP}{TP + FP}$$

$$Recall = \frac{TP}{TP + FN}$$

$$F1 = 2 \times \frac{Precision \times Recall}{Precision + Recall}$$

163 The above metrics are computed based on True Positive (TP), True Negative (TN), False  
164 Positive (FP), and False Negative (FN). TP represents the number of samples for which the  
165 classifier predicts positive cases as positive cases; TN is the number of samples for which the  
166 classifier predicts negative cases as negative cases; FP denotes the number of samples for which  
167 the classifier predicts negative cases as positive cases; and FN represents the number of  
168 samples for which the classifier predicts positive cases as negative cases.

169 The model was trained based on a specific given segment, or the whole genome as a  
170 conjunction of all segments. We selected the model parameter with the highest accuracy in the  
171 validation set throughout the training cycle as the final weights for each segment model. Once  
172 the training was completed, we used the best performing model weights to predict the test set.

### 173 **2.3 Included Methods for Comparisons**

174 We compared Flu-CNN with several state-of-the-art studies for a comprehensive study on our  
175 performance on predicting influenza viruses host tropism.

176 Virus Deep learning HOst Prediction (VIDHOP) is a fast and accurate deep learning approach

177 used for viral host prediction [41]. It requires partial sequences of the viral genome (100–400  
178 bp long) without other virus features and predicts hosts at the species level for three viruses  
179 (IAVs, rabies hemolytic virus, and rotavirus A. VIDHOP can predict up to 36 host types for  
180 IAVs, 32 of which are closely related avian species. The architecture of VIDHOP for IAVs  
181 consists of three bidirectional Long short-term memory (LSTM) layers and two fully connected  
182 layers.

183 ML-(d)nts is a machine learning model used for predicting the nucleotide compositions of  
184 human-adapted IAVs [19]. Nucleotide compositions includes characterized mononucleotides  
185 (nts) and dinucleotides (dnts). The human adaptation of IAVs sequences were predicted by  
186 computing (d)nts features of six viral gene segments. The principal components analysis (PCA)  
187 and hierarchical clustering analysis revealed the linear separability of optimized (d)nts between  
188 the human-adaptive and avian-adaptive sets. The confusion matrix results and the area under  
189 the receiver operating characteristic curve indicate that the machine learning model has high  
190 performance in predicting human tropism of IAVs.

191 FluPhenotype is an online platform for early warning of IAVs, which accepts complete or  
192 partial genomic sequences to determine the virus phenotype rapidly [25]. An extensive  
193 collection of identified influenza virus molecular markers is available in FluPhenotype.  
194 Analysis of these molecular markers enables integrated inference of potential hosts of the  
195 viruses, including host type (avian, human, swine and other mammals), detailed host species,  
196 and probabilities for each host type. This method can be used for rapid determination of IAVs  
197 hosts, antigenicity, virulence, and drug resistance.

198 In addition, hosts of viral strains can be determined based on the phylogenetic tree of IAVs,  
199 which serves as a supplementary validation. The evolutionary tree of IAVs reveals different  
200 strains and their evolutionary relationships. Different epitope structures carried by different  
201 strains cause differences in host affinity, transmission ability, and so on. Information about the  
202 transmission paths, evolutionary patterns, and related characteristics of IAVs in different  
203 regions and time periods can also be revealed in the evolutionary tree.

## 204 **3 Results**

### 205 **3.1 Host Tropism Prediction**

#### 206 **3.1.1 General Prediction of Host Tropism**

207 To investigate the effectiveness of our approach, we compared Flu-CNN with two other  
208 methods, i.e., ML-(d)nts and VIDHOP, on a test set comprising 16,001 viral genomes that  
209 contained various subtypes. FluPhenotype and phylogenetic methods are not included because  
210 they cannot support a large number of strains. Phylogenetic presents challenges in constructing  
211 trees and distinguish virus host at a significant scale, and FluPhenotype requires individual  
212 genome-level operations on an online site. Table 1 presents the performance of studied methods,  
213 in which Flu-CNN outperformed other methods, both in individual gene segments and in the  
214 whole genome. In particular, our model achieved scores over 99% across all metrics for PB2,  
215 PA, HA, and the whole genome. On average, Flu-CNN outperforms VIDHOP by 9% in Recall  
216 and Accuracy, and by 5% in F1-score. And all four performance parameters were better than  
217 ML-(d)nts.

218 In summary, our results demonstrate that Flu-CNN exhibits superior performance compared to  
219 state-of-the-art methods in predicting the host tropism of IAVs.

220  
221  
222  
223

Table 1. Performance of Flu-CNN and compared methods on the test set. Because the ML-(d)nts method is not recommended for MP segment and NS segment, the corresponding result is not applicable (NA).

| Segment  | PB2     |           |        | PB1     |           |        | PA      |           |        |
|----------|---------|-----------|--------|---------|-----------|--------|---------|-----------|--------|
| Method   | Flu-CNN | ML-(d)nts | VIDHOP | Flu-CNN | ML-(d)nts | VIDHOP | Flu-CNN | ML-(d)nts | VIDHOP |
| Accuracy | 0.9963  | 0.9828    | 0.8253 | 0.9838  | 0.9781    | 0.7735 | 0.9908  | 0.9585    | 0.9116 |

|                  |                |                  |               |                |                  |               |                     |                  |               |
|------------------|----------------|------------------|---------------|----------------|------------------|---------------|---------------------|------------------|---------------|
| <b>Precision</b> | 0.9963         | 0.9836           | 0.9863        | 0.9839         | 0.9794           | 0.9859        | 0.9907              | 0.9628           | 0.9864        |
| <b>Recall</b>    | 0.9963         | 0.9828           | 0.8253        | 0.9838         | 0.9781           | 0.7735        | 0.9908              | 0.9585           | 0.9116        |
| <b>F1-score</b>  | 0.9963         | 0.9829           | 0.8950        | 0.9837         | 0.9783           | 0.8586        | 0.9907              | 0.9592           | 0.9465        |
| <b>Segment</b>   | <b>HA</b>      |                  |               | <b>NP</b>      |                  |               | <b>NA</b>           |                  |               |
| <b>Method</b>    | <b>Flu-CNN</b> | <b>ML-(d)nts</b> | <b>VIDHOP</b> | <b>Flu-CNN</b> | <b>ML-(d)nts</b> | <b>VIDHOP</b> | <b>Flu-CNN</b>      | <b>ML-(d)nts</b> | <b>VIDHOP</b> |
| <b>Accuracy</b>  | 0.9928         | 0.9819           | 0.9801        | 0.9850         | 0.9843           | 0.9350        | 0.9898              | 0.9816           | 0.9783        |
| <b>Precision</b> | 0.9928         | 0.9829           | 0.9867        | 0.9850         | 0.9849           | 0.9864        | 0.9898              | 0.9825           | 0.9868        |
| <b>Recall</b>    | 0.9928         | 0.9819           | 0.9801        | 0.9850         | 0.9843           | 0.9350        | 0.9898              | 0.9816           | 0.9783        |
| <b>F1-score</b>  | 0.9928         | 0.9821           | 0.9832        | 0.9849         | 0.9844           | 0.9592        | 0.9897              | 0.9818           | 0.9823        |
| <b>Segment</b>   | <b>MP</b>      |                  |               | <b>NS</b>      |                  |               | <b>All Segments</b> |                  |               |
| <b>Method</b>    | <b>Flu-CNN</b> | <b>ML-(d)nts</b> | <b>VIDHOP</b> | <b>Flu-CNN</b> | <b>ML-(d)nts</b> | <b>VIDHOP</b> | <b>Flu-CNN</b>      | <b>ML-(d)nts</b> | <b>VIDHOP</b> |
| <b>Accuracy</b>  | 0.9861         | NA               | 0.7600        | 0.9886         | NA               | 0.9543        | 0.9955              | 0.9819           | 0.9775        |
| <b>Precision</b> | 0.9865         | NA               | 0.9860        | 0.9886         | NA               | 0.9866        | 0.9955              | 0.9830           | 0.9869        |
| <b>Recall</b>    | 0.9861         | NA               | 0.7600        | 0.9886         | NA               | 0.9543        | 0.9955              | 0.9819           | 0.9775        |
| <b>F1-score</b>  | 0.9862         | NA               | 0.8486        | 0.9885         | NA               | 0.9697        | 0.9955              | 0.9821           | 0.9819        |

224  
225  
226  
227  
228  
229  
230  
231  
232  
233  
234  
235  
236

### 3.1.2 Performance across Different Subtypes

Further, we explore different performance of each method on different subtypes. The test set is separated according to the subtype and the performance is further evaluated on this dimension. The performance on different subtypes is shown in Figure 2. Those approaches can all perform well on some subtypes, such as H2N1 and H3N2. However, in term of subtypes such as H1H1, H2N2 and H7N9, those methods can have different performance: Flu-CNN still maintains high accuracy, but the accuracy of other methods is limited. This shows that Flu-CNN not only has the best overall accuracy, but also achieves a high accuracy on individual subtypes. Hence, Flu-CNN exhibits its stability and performs the best across all subtypes. Such a stable performance across different subtypes of IAVs demonstrate the generality of our method in the field of IAV.

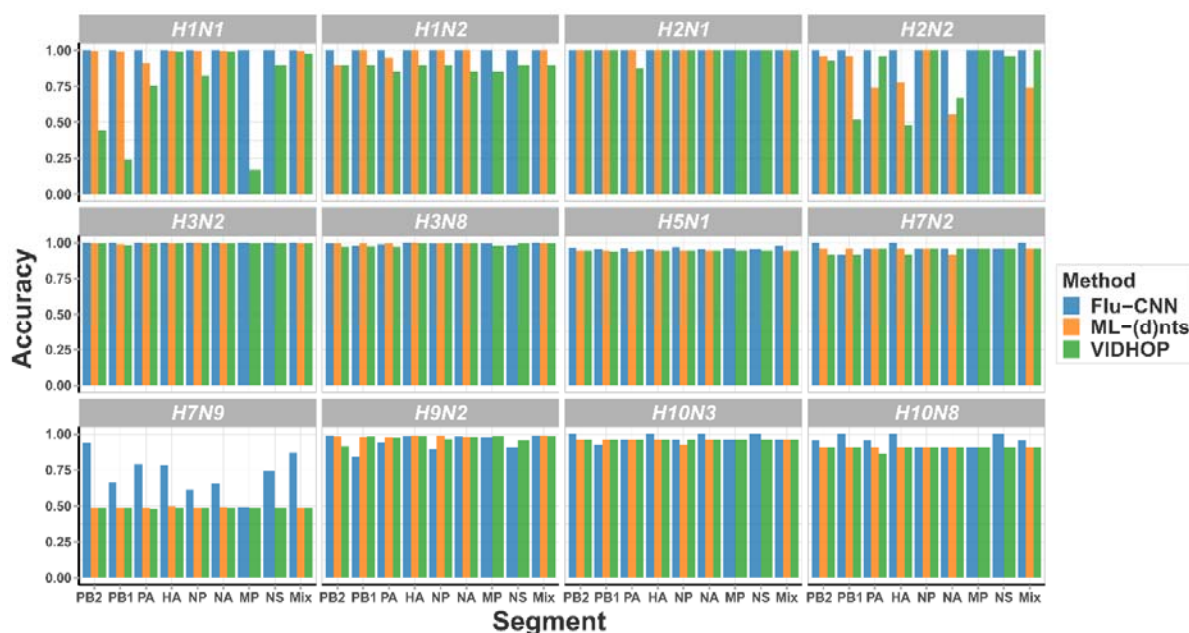

237  
238  
239  
240  
241

Fig. 2 Histogram of accuracies on different subtypes. Each subtype is a subplot with horizontal coordinates indicating individual genome segments and genome-wide synthesis (Mix), and vertical coordinates indicating accuracy. Because the ML-(d)nts method is not recommended for MP segment and NS segment, the corresponding result is not applicable (NA).

242  
243  
244  
245  
246  
247  
248  
249  
250  
251  
252  
253  
254  
255  
256  
257  
258  
259  
260  
261  
262  
263  
264  
265

### 3.1.3 Specific Investigation on H5N1, H7N9, and H9N2

H3N2 and H1N1 are the predominating IAV subtypes, and they also account for the vast majority of our dataset. However, for some of the less abundant and minority subtypes, such as H5N1, H7N9, and H9N2, their insufficient data and significant bias may cause limited performance on these subtypes. Despite minority, they are the top three most infected human in avian influenza. So, this subsection particularly investigates the performance on those subtypes. And all the four state-of-the-art methods, ML-(d)nts and, VIDHOP, we have added other two methods, phylogenetic and FluPhenotype, and the phylogenetic method, are included, because the experiment is conducted on small-scale dataset.

All sequences of the above three subtypes, including the training set, validation set and test set, are analyzed and compared using Flu-CNN and other methods. We randomly sampled 100 sequences from three subtypes by the ratio of human to avian 1:1 for 20 times, as the dataset for performance evaluation. In this subsection, the experiment is conducted on small-scale dataset, so all the four state-of-the-art methods, ML-(d)nts, VIDHOP, FluPhenotype, and the phylogenetic method, are included.

The scatter plots of sampling accuracy of different methods on H5N1, H7N9, and H9N2 subtypes are shown in Figure 3. It can be observed that VIDHOP and ML-(d)nts methods may have difficulty in identifying the host species in these three subtypes, with the accuracy only around 50%. Although the phylogenetic and FluPhenotype may be unstable in accuracy, they performed better compared to the VIDHOP and ML-(d)nts methods. Among all the five methods, our Flu-CNN still achieves the best performance, presenting both the most stable and highest accuracy across all three subtypes.

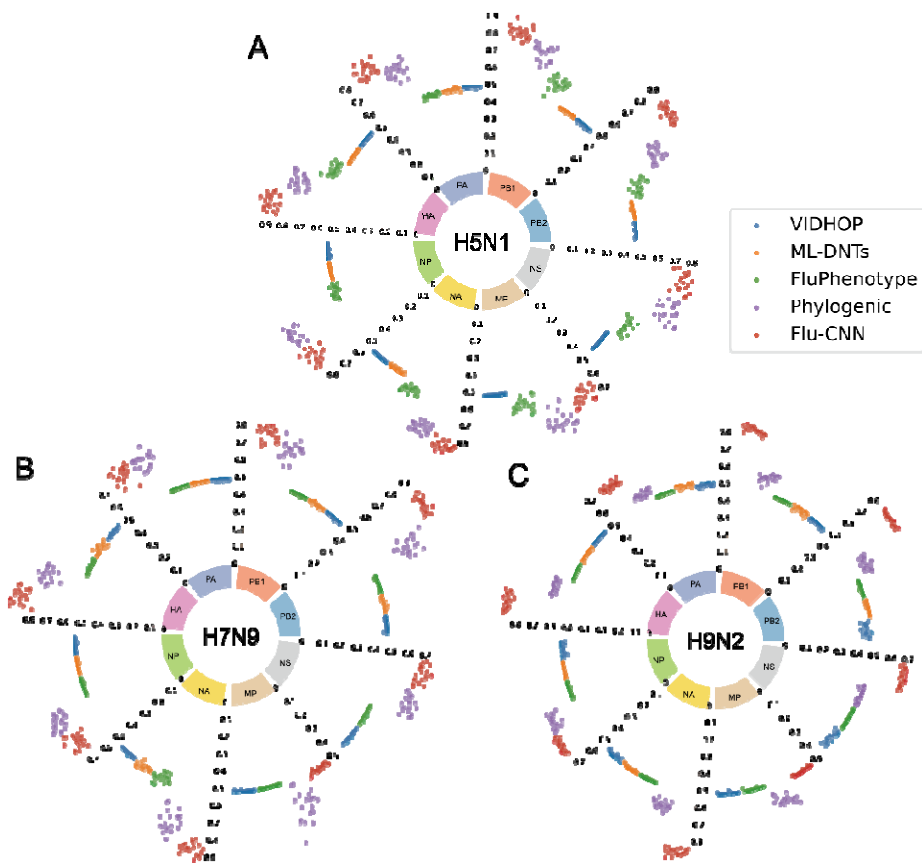

266  
267  
268

Fig. 3 Ring bar chart of accuracy on certain subtypes: A. H5N1. B. H7N9. C. H9N2. Each sector area represents a genomic

269 segment. Each point represents one sample of accuracy result of methods: the blue dots for VIDHOP, the orange dots for  
270 ML-(d)nts method, the green dots for FluPhenotype method, the purple dots for phylogenetic method, and the red dots for  
271 Flu-CNN.  
272

### 273 3.2 Interpretability of Flu-CNN

274 Neural networks are often considered as a black box, and it is challenging to understand their  
275 underlying working mechanisms and internal computation process intuitively. In this  
276 subsection, we visualize the middle layer of Flu-CNN to understand the feature representation  
277 inside the model and investigate whether it learns the valuable feature information. We utilized  
278 Uniform Manifold Approximation and Projection (UMAP) to conduct the dimension reduction  
279 [24], by which we projected the middle layer vectors into a two-dimensional space for further  
280 visualizations.

281 To take HA and NA segments as examples, their UMAP visualizations are shown in Figure 4.  
282 Obviously, different host tropism can be clearly distinguished in the UMAP visualization, and  
283 therefore Flu-CNN can learn the key features to distinguish the hosts by convolution layers. In  
284 addition to hosts, Flu-CNN is also capable of extracting important features to distinguish  
285 subtypes. The UMAP visualization shows that sequences of different subtypes can be separated  
286 by the model. Consequently, the convolutional network of Flu-CNN not only extracts the host  
287 tropism information of IAVs, but also can support the classification of different subtypes.

288 Notably, Flu-CNN has only six convolutional layers and three fully connected layers, with less  
289 than 10 million parameters. Compared with other large models with hundreds of layers and  
290 billions of parameters, our model may appear simple. Even so, Flu-CNN can still extract  
291 important features, and achieves remarkable performance in predicting the host tropism of IAV,  
292 which demonstrate the effectiveness of our method.  
293

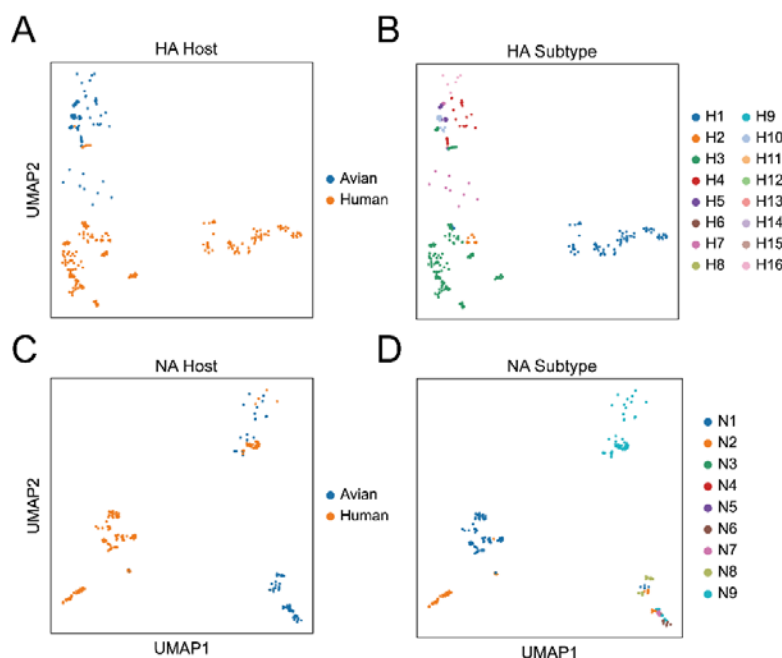

294  
295  
296 Fig. 4 UMAP visualization of the convolutional layer output in Flu-CNN. Different hosts and subtypes are represented by  
297 different color points. A. HA segment colored by hosts. B. HA segment colored by subtypes. C. NA segment colored by hosts.  
298 D. NA segment colored by subtypes.  
299

### 300 3.3 Identifying Key Amino Acid Substitutions for Host Tropism Transition of IAVs

301 The antigenicity of influenza virus proteins is an important factor in the host tropism [18].  
302 Previous studies have detected numerous amino acid phenotypes as biomarkers of



303 human-adapted IAVs, which plays a critical role in cross-host transmission of avian influenza  
304 [25]. Hence, identifying human adaptive amino acid phenotypes of influenza viruses is of great  
305 significance to the surveillance and pre-warning of the influenza. Conventionally, these  
306 phenotypes have been determined primarily through biological experiments, which can be  
307 generally accurate. However, experimental methods can be both time-consuming and  
308 labor-intensive, and further requires a laboratory of biosafety level 3 [26], which may be vastly  
309 expensive for large-scale studies.  
310 From a computational perspective, such substitutions can be identified by Flu-CNN.  
311 Specifically, we can examine individual substitutions respectively, by using Flu-CNN to  
312 investigate the change of host tropism after applying mutations to the gene segment. Thus,  
313 Flu-CNN can effectively identify specific amino acid mutations by estimating the effect of each  
314 mutation on the IAV host tropism. With a focus on PB2, PA, and NP, we have identified several  
315 key amino acid substitutions affecting human tropism of avian influenza viruses.  
316 To take the PB2 protein as an example, Flu-CNN screened eight important amino acid  
317 substitutions (T108V, A274S, S286G, Q591R, Q591K, E627K, D701N, D701E) for host  
318 adaptability. Figure 5 visualizes these eight substitutions in the visualized structure of PB2  
319 protein. It can be found that these substitutions are all located on the outer surface of the protein.  
320 Of these, five mutations (S286G, Q591R, Q591K, E627K, D701N) have been biologically  
321 validated as key amino acid phenotypes for human tropism of IAV, by current literatures  
322 [27-29]. The other three substitutions (T108V, A274S, D701E) are also located in important  
323 functional regions. The T108V mutation is at the N-terminal of PB2 protein, in the minimal  
324 recognition sequence for the binding of PB1 protein and NP protein in the polymerase  
325 heterotrimer. A274S is at the N-terminal of PB2 protein, in the sequence associated with cap  
326 binding. D701E is at the C-terminal of PB2 protein, in the same position as the D701N  
327 substitution. Considering their structural functions, it can be concluded that they may play a  
328 part in the host tropism, although their detailed effects still remain to be elucidated in future  
329 investigations. Results and visualizations for PA and NP segments are presented in  
330 Supplementary Material.  
331

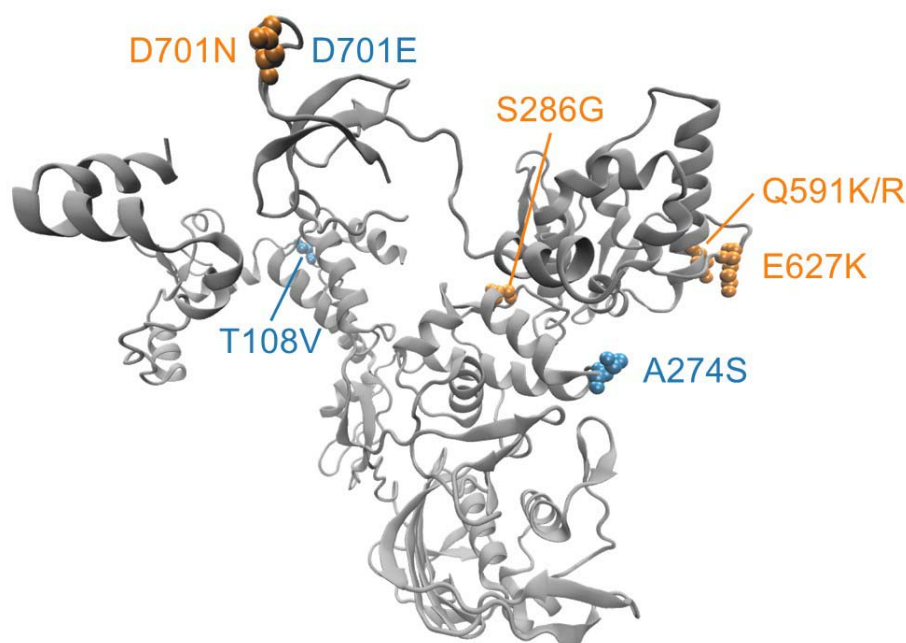

332  
333  
334

Fig. 5 The key human-adapted amino acid substitutions of PB2 protein (PDB: 6QPF) [34] screened by Flu-CNN, visualized

335 by Visual Molecular Dynamics (VMD) [35, 36]. The selected amino acid substitutions are denoted in blue and yellow. Yellow  
336 indicates that the substitution has been experimentally verified, and blue indicates that the substitution has not been reported  
337 in the current literature, with other areas in grey.

338

### 339 3.4 Verification on Zoonotic IAV Strains

340 Zoonotic IAVs can pose a significant threat, which may bring about global epidemics. In case of  
341 such a threat, Flu-CNN can serve for the identification and prediction of zoonotic strains.  
342 Christine L. P. Eng have retrieved and studied discriminating zoonotic strains in four groups,  
343 including 5,685 typical avian influenza strains, 5,110 human typical influenza strains, 126  
344 confirmed zoonotic influenza strains of human origin, and 346 suspected zoonotic influenza  
345 strains of avian origin [16]. Based on those strains, we employed our model to categorize their  
346 host tropism, which is colored by hosts and visualized in groups.

347 The categorized zoonotic IAVs are visualized in Figure 6. As shown in Figure 6, most of the  
348 IAVs had only a single host tropism. Both the typical avian strains in Figure 6A and human  
349 strains in Figure 6D demonstrate the uniformity in host tropism. In contrast, the suspected  
350 zoonotic strains isolated from avian sources (Figure 6B) and confirmed zoonotic strains  
351 isolated from human sources during zoonotic outbreaks (Figure 6C) displayed a mosaic mixing  
352 pattern in their genomic segments. Among the confirmed zoonotic strains, the proportion of  
353 human tropic strains was significantly higher than that of suspected zoonotic strains. This  
354 phenomenon shows that these strains do have some zoonotic risk and the risk of confirmed  
355 zoonotic strains is higher than that of suspected zoonotic strains.

356 Notably, the result of Flu-CNN is consistent with the work of Christine. This indicates that the  
357 species barrier does exist between various classes of influenza virus host, which prevents most  
358 avian Influenza viruses with only avian genes from free cross-host transmissions.

359

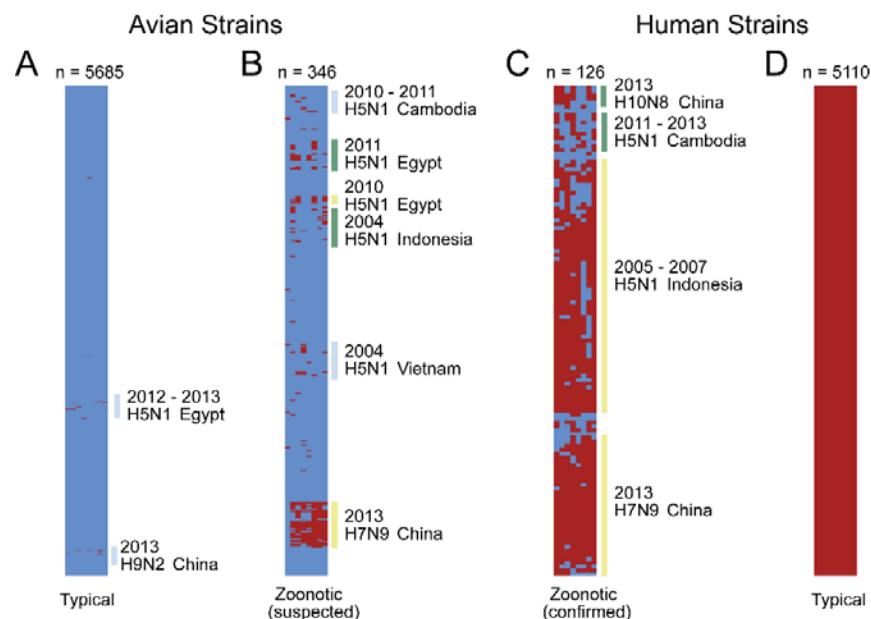

360

361

362 Fig. 6 Segmental host tropism signatures of human, avian and zoonotic strains from Christine. Each row represents a strain,  
363 and each column represents a gene segment, with red representing human adaption and blue representing avian adaption. A.  
364 Typical avian strain. B. Suspected zoonotic strains isolated from avian during zoonotic outbreaks. C. Confirmed zoonotic  
365 strains isolated from human during zoonotic outbreaks. D. Typical human strain.

366

367 Furthermore, we utilized Flu-CNN to identify zoonotic strains in the entire dataset collected in  
368 this research. As shown in Figure 7, the vast majority of strains are single host-adapted, which  
369 is incapable of cross-host transmissions. However, there are seven lineages that may have  
370 zoonotic risks, which show a mosaic pattern of host adaptability. These strains cover four

371 subtypes of H5N1, H5N6, H7N9 and H9N2, as depicted in Figure 7.  
372

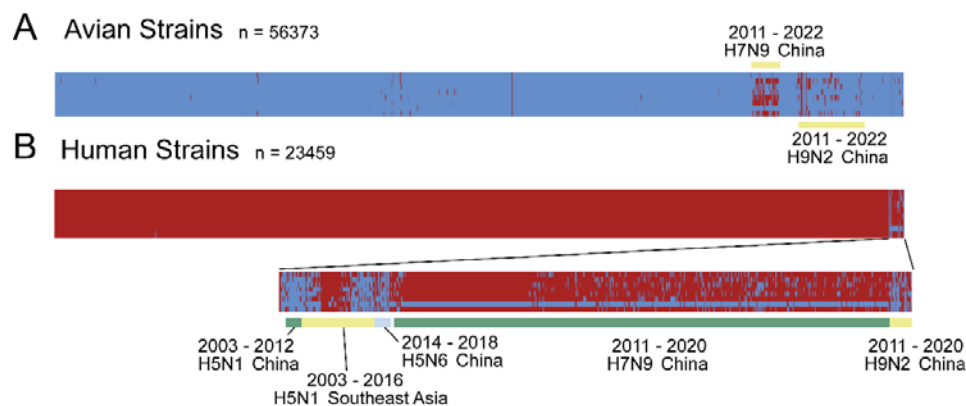

373  
374  
375  
376  
377  
378

Fig. 7 Segmental host tropism signatures of human, avian and zoonotic strains from the entire data in this research. Each column represents a strain, and each row represents a gene segment, with red representing human adaptation and blue representing avian adaptation. A. Avian strains. B. Human strains.

## 379 4 Discussion

380 The host that IAV can infect is strictly limited by its host tropism, and changes in host tropism  
381 may lead to cross-host transmission. While numerous factors can function in the viral host  
382 tropism, there is no systematic criterion for assessing those factors. Therefore, the identification  
383 of IAVs host tropism has been an important research issue. Meanwhile, deep learning has been  
384 widely applied in the fields of protein structure prediction, protein function prediction, and  
385 genetic engineering, and is vastly promising for the host tropism investigation of IAVs [30-32].  
386 Benefitted from this, we used a powerful deep network to distinguish viral tropism in different  
387 hosts more effectively and efficiently.

388 This research focuses on analyzing patterns of IAV tropism in humans and avian species and  
389 establishing a method of rapid identification of IAV host tropism. We collected the largest  
390 dataset of IAV sequences to date, which is approximate to one million sequences. These  
391 sequences showed a clear bias, mostly for the H3N2 and H1N1 subtypes, originating from the  
392 United States and China. We constructed Flu-CNN, which demonstrated outstanding  
393 performance with an accuracy of over 99% in all segments of the genome. Compared to other  
394 methods, Flu-CNN exhibited exceptional stability and superior performance, especially for  
395 H5N1, H7N9, and H9N2 subtypes with cross-host transmission. Compared with Flu-CNN,  
396 other methods may have slightly weaker performance due to various reasons. In general, it  
397 could be that the IAVs data used has a significant bias. Specifically, the ML-(d)nts method  
398 innovatively proposes that nucleotide composition features are related to IAVs host adaptation,  
399 the VIDHOP method is better at identifying hosts at the species level, and the FluPhenotype  
400 method focuses on comprehensive analysis of IAVs phenotypes.

401 The better performance of Flu-CNN can be explained by various reasons, including the large  
402 size of training data, the sufficient number of training sessions, and the effective learning  
403 structure by our proposed model. Besides, our analysis of intermediate layer vectors generated  
404 by Flu-CNN indicated that the convolutional network could effectively extract  
405 high-dimensional information from genome sequences. It is generally believed that  
406 convolutional networks are effective in extracting local features of the input data. With more  
407 convolutional layers and pooling layers, convolutional networks can also contribute to the  
408 extraction of global features. Notably, the capability of our approach for distinguishing  
409 subtypes and establishing key viral features suggests that convolutional networks can reveal the  
410 underlying information within viral sequences and even accomplish additional tasks.

411 All methods show fluctuating performance on subtypes. The accuracy of different subtypes  
412 varies greatly, and the accuracy of some subtypes is relatively poor. There may be many reasons  
413 for this situation. Some subtypes have a small number of sequences, low richness within the  
414 sequence, and high sequence similarity between different subtypes. So far, how these subtypes  
415 spread across hosts and how to evolve in the next step have yet to be studied which demonstrate  
416 that we still know little about them. Accurate identification of different subtypes of host tropism  
417 is not a simple matter. Even so, our method can still effectively mine useful information and  
418 maintain high accuracy, which shows the effectiveness of our method.

419 Although there has been no clear evidence of direct human-to-human transmission of avian  
420 influenza viruses, the possibility for their evolving into human-to-human transmissible viruses  
421 cannot be utterly denied. Once the mutations or reassortment occurs in such viruses, it is likely  
422 that they can acquire the ability to transmit between human beings and therefore change the  
423 host tropism. Accordingly, it is crucial to identify human-adapted amino acid phenotypes in  
424 IAVs, which can significantly contribute to the study on antigenic epitope signatures and the  
425 assessment of viral risk. Nevertheless, such an identification solely based on experimental  
426 screening can be inefficient and resource-intensive. In the present study, we screened key amino  
427 acid substitutions of certain segmental proteins using Flu-CNN and found several important  
428 mutations. Most of the discovered substitutions can be validated to be effective by supportive  
429 literature references, which demonstrate the effectiveness of our screening. For those with no  
430 supportive references, they may serve as candidates for human-adapted amino acid  
431 substitutions, which serves as the guidance for future biological investigations.

432 While identifying human-adapted amino acid phenotypes, we take the PB2 protein as a major  
433 example, because it is indispensable to virus replication and is a pivotal determinant of host  
434 range [33]. Researchers have discovered that distinct PB2 proteins affect viral growth  
435 performance, pathogenicity, and infection range [34-36]. Moreover, PB2 proteins are  
436 implicated in signaling pathways that follow viral infection, including blocking JAK1/STAT  
437 signaling via targeting JAK1 for degradation through proteasomal mechanisms, indicating that  
438 the PB2 protein is essential in regulating the interaction between virus and host [37].  
439 Meanwhile, we have also screened PA and NP, whose results are presented in Supplementary  
440 Material.

441 The avian influenza viruses that threaten humans are usually zoonotic influenza viruses.  
442 Human infections by those viruses are usually through direct contact with infected animals or  
443 contaminated environments, which do not spread from human to human. However, if these  
444 viruses acquire the capability of sustainable human-to-human transmission, they could cause a  
445 pandemic because humans have very limited immunity to them. Hence, the early detection and  
446 surveillance of zoonotic influenza viruses is vastly important. This study shows that Flu-CNN  
447 is capable of detecting avian influenza strains that may cross over from avian to human by  
448 identifying zoonotic strains. From the zoonotic results by Flu-CNN, the host tropism of each  
449 segment gene is mostly the same. Subtypes H5N1, H7N9, and H9N2 account for the majority  
450 of zoonotic strains, and geographically, China and Southeast Asia are frequent outbreaks, and  
451 these subtypes and regions should be the focus of our outbreak surveillance.

## 452 **5 Conclusion**

453 This paper has proposed a deep neural network approach named Flu-CNN as a valuable tool for  
454 identifying the host tropism of IAVs. Our approach can rapidly identify the host tropism of  
455 viruses merely by viral genomic sequences, without extracting any abstract features. It achieves  
456 more than 99 % accuracy and maintains its stability in accuracy, which enjoys the best  
457 performance across different gene segments and subtypes. The interpretability study  
458 demonstrate that our model can capture valuable features from genome sequences, and can  
459 even support the classification of subtypes. We have also used Flu-CNN to identify amino acid  
460 substitutions that affect host adaptability of IAV and to assess the zoonotic risk of viral strains.

461 In summary, this is a valuable approach for analyzing the potential risk and the genomic data of  
462 IAVs. This research also produces innovative insights into the evolutionary characterization of  
463 IAV, which may contribute to the surveillance of potential outbreaks and spread of IAVs.

### 464 **Highlights**

- 465 ● The proposed Flu-CNN is currently the most accurate method to predict IAV host tropism.
- 466 ● Key amino acid substitutions that affect IAV host adaption can be identified by Flu-CNN.
- 467 ● Flu-CNN can effectively predict the zoonotic risk of IAV strains.

### 468 **Acknowledgement**

469 We gratefully acknowledge the scientific community on the NCBI VIRUS, IRD and GISAID  
470 platform and all contributing experts in influenza A virus sequences.

### 471 **Availability and Implementation**

472 All the data, source code and documentation are available at  
473 <https://github.com/southwood-luo/Flu-CNN>.

### 474 **Funding**

475 This work was supported by the National Natural Science Foundation of China [grant numbers  
476 32070025, 62206309, 31800136]

### 477 **Conflict of Interest**

478 The authors declare no competing interests.

479

## References:

480

481

482

483

484

485

486

487

488

489

490

491

492

493

494

495

496

497

498

499

500

501

502

503

504

505

506

507

508

509

510

511

512

513

514

515

516

517

518

519

520

521

522

523

524

525

526

527

528

529

530

531

532

533

534

535

536

537

538

1. Ren H, Jin Y, Hu M et al. Ecological dynamics of influenza A viruses: cross-species transmission and global migration, *Sci Rep* 2016;6:36839.
2. Gong X, Hu M, Chen W et al. Reassortment Network of Influenza A Virus, *Frontiers in Microbiology* 2021;12:793500.
3. Nuwarda RF, Alharbi AA, Kayser V. An Overview of Influenza Viruses and Vaccines, *Vaccines (Basel)* 2021;9.
4. Wille M, Barr IG. Resurgence of avian influenza virus, *SCIENCE* 2022;376:459-460.
5. Scarafoni D, Telfer BA, Ricke DO et al. Predicting Influenza A Tropism with End-to-End Learning of Deep Networks, *Health Security* 2019;17:468-476.
6. Long JS, Mistry B, Haslam SM et al. Host and viral determinants of influenza A virus species specificity, *NATURE REVIEWS MICROBIOLOGY* 2019;17:67-81.
7. Vijaykrishna D, Mukerji R, Smith GJ. RNA Virus Reassortment: An Evolutionary Mechanism for Host Jumps and Immune Evasion, *PLoS Pathogens* 2015;11:e1004902.
8. Nelson MI, Holmes EC. The evolution of epidemic influenza, *NATURE REVIEWS GENETICS* 2007;8:196-205.
9. Li KS, Guan Y, Wang J et al. Genesis of a highly pathogenic and potentially pandemic H5N1 influenza virus in eastern Asia, *NATURE* 2004;430:209-213.
10. Peiris M, Yuen KY, Leung CW et al. Human infection with influenza H9N2, *LANCET* 1999;354:916-917.
11. Li YT, Linster M, Mendenhall IH et al. Avian influenza viruses in humans: lessons from past outbreaks, *Br Med Bull* 2019;132:81-95.
12. WHO WHO (2023), 'Avian Influenza Weekly Update Number 884'.
13. Webster RG, Bean WJ, Gorman OT et al. Evolution and ecology of influenza A viruses, *Microbiol Rev* 1992;56:152-179.
14. Kislinger T, Cox B, Kannan A et al. Global survey of organ and organelle protein expression in mouse: combined proteomic and transcriptomic profiling, *CELL* 2006;125:173-186.
15. Bouvier NM. Animal models for influenza virus transmission studies: a historical perspective, *Current Opinion in Virology* 2015;13:101-108.
16. Eng CL, Tong JC, Tan TW. Distinct Host Tropism Protein Signatures to Identify Possible Zoonotic Influenza A Viruses, *PLoS One* 2016;11:e150173.
17. Eng C, Tong JC, Tan TW. Predicting Zoonotic Risk of Influenza A Viruses from Host Tropism Protein Signature Using Random Forest, *INTERNATIONAL JOURNAL OF MOLECULAR SCIENCES* 2017;18.
18. Qiang X, Kou Z, Fang G et al. Scoring Amino Acid Mutations to Predict Avian-to-Human Transmission of Avian Influenza Viruses, *MOLECULES* 2018;23.
19. Li J, Zhang S, Li B et al. Machine Learning Methods for Predicting Human-Adaptive Influenza A Viruses Based on Viral Nucleotide Compositions, *MOLECULAR BIOLOGY AND EVOLUTION* 2020;37:1224-1236.
20. Zhang X, Zhao J, LeCun Y (2015), 'Character-level convolutional networks for text classification', *Proceedings of the 28th International Conference on Neural Information Processing Systems - Volume 1*, MIT Press, Montreal, Canada, pp. 649-657.
21. Hatcher EL, Zhdanov SA, Bao Y et al. Virus Variation Resource - improved response to emergent viral outbreaks, *NUCLEIC ACIDS RESEARCH* 2017;45:D482-D490.
22. Shu Y, McCauley J. GISAID: Global initiative on sharing all influenza data - from vision to reality, *Euro Surveill* 2017;22.
23. Zhang Y, Aevermann BD, Anderson TK et al. Influenza Research Database: An integrated bioinformatics resource for influenza virus research, *NUCLEIC ACIDS RESEARCH* 2017;45:D466-D474.
24. McInnes L, Healy J. UMAP: Uniform Manifold Approximation and Projection for Dimension Reduction, *ArXiv* 2018;abs/1802.03426.
25. Lu C, Cai Z, Zou Y et al. FluPhenotype-a one-stop platform for early warnings of the influenza A virus, *BIOINFORMATICS* 2020;36:3251-3253.
26. Radigan KA, Misharin AV, Chi M et al. Modeling human influenza infection in the laboratory, *Infection and Drug Resistance* 2015;8:311-320.
27. Wen L, Chu H, Wong BH et al. Large-scale sequence analysis reveals novel human-adaptive markers in PB2 segment of seasonal influenza A viruses, *Emerg Microbes Infect* 2018;7:47.
28. Yamada S, Hatta M, Staker BL et al. Biological and structural characterization of a host-adapting amino acid in influenza virus, *PLoS Pathogens* 2010;6:e1001034.
29. Manz B, de Graaf M, Mogling R et al. Multiple Natural Substitutions in Avian Influenza A Virus PB2 Facilitate Efficient Replication in Human Cells, *JOURNAL OF VIROLOGY* 2016;90:5928-5938.
30. Kim H, Park K, Yon JM et al. Predicting multipotency of human adult stem cells derived from various donors through deep learning, *Sci Rep* 2022;12:21614.

- 539 31. Guzzi PH, Lomoio U, Puccio B et al. Structural analysis of SARS-CoV-2 Spike protein variants through  
540 graph embedding, *Netw Model Anal Health Inform Bioinform* 2023;12:3.
- 541 32. Wang H, Ma X. Learning discriminative and structural samples for rare cell types with deep generative  
542 model, *BRIEFINGS IN BIOINFORMATICS* 2022;23.
- 543 33. Subbarao EK, London W, Murphy BR. A single amino acid in the PB2 gene of influenza A virus is a  
544 determinant of host range, *JOURNAL OF VIROLOGY* 1993;67:1761-1764.
- 545 34. Kim G, Shin HM, Kim HR et al. Effects of host and pathogenicity on mutation rates in avian influenza A  
546 viruses, *Virus Evol* 2022;8:c13.
- 547 35. Ivan FX, Kwoh CK. Rule-based meta-analysis reveals the major role of PB2 in influencing influenza A  
548 virus virulence in mice, *BMC GENOMICS* 2019;20:973.
- 549 36. Choi EJ, Lee YJ, Lee JM et al. The effect of mutations derived from mouse-adapted H3N2 seasonal influenza  
550 A virus to pathogenicity and host adaptation, *PLoS One* 2020;15:e227516.
- 551 37. Yang H, Dong Y, Bian Y et al. The influenza virus PB2 protein evades antiviral innate immunity by  
552 inhibiting JAK1/STAT signalling, *Nature Communications* 2022;13:6288.
- 553 38. LeCun Y, Bengio Y, Hinton G. Deep learning, *NATURE* 2015;521:436-444.
- 554 39. Glorot X, Bordes A, Bengio Y. Deep Sparse Rectifier Neural Networks, *JOURNAL OF MACHINE*  
555 *LEARNING RESEARCH* 2011;15:315-323.
- 556 40. Srivastava N, Hinton G, Krizhevsky A et al. Dropout: A Simple Way to Prevent Neural Networks from  
557 Overfitting, *JOURNAL OF MACHINE LEARNING RESEARCH* 2014;15:1929-1958.
- 558 41. Mock F, Viehweger A, Barth E et al. VIDHOP, viral host prediction with deep learning,  
559 *BIOINFORMATICS* 2021;37:318-325.
- 560
